# Supplementary material for: Preparation of 5-methylfurfural from starch in one step by iodide mediated metal-free hydrogenolysis
Source: Royal Society of Chemistry journal article supplement (doi:10.1039/c9gc01645g), 2019-01-01
Supplement: c9gc01645g1.pdf [file c9gc01645g1.pdf]

## Supporting Information

### The preparation method of 2-iodomethylfuran

In a 25 mL round bottom flask furfuryl alcohol, acetonitrile, NaI and P<sub>2</sub>O<sub>5</sub> were added, we obtained 80.1% 2-iodomethylfuran (Scheme 3). The prepared 2-iodomethylfuran solution was passed through 0.22 µm filter (the solid matter was removed) into 50 ml reactor lining and heated to 100°C reaction for 30 min by passing through a 300 psi H<sub>2</sub>/N<sub>2</sub> seal.

**Table S1** Metal ion concentration table in the reaction solution

| Elem   | Avg      | Units |
|--------|----------|-------|
| Al1670 | 0.07574  | ppm   |
| As1890 | 0.2570   | ppm   |
| B 2497 | 0.1223   | ppm   |
| Ba4554 | 0.000996 | ppm   |
| Be3130 | 0.5299   | ppm   |
| Bi2230 | 0.01746  | ppm   |
| Cd2288 | 0.02754  | ppm   |
| Co2286 | 0.1926   | ppm   |
| Cr2835 | 0.06133  | ppm   |
| Cu3247 | 0.06133  | ppm   |
| Fe2599 | 0.7966   | ppm   |
| Ga2943 | -0.01578 | ppm   |
| Ir2242 | 0.001183 | ppm   |
| Li6707 | 0.004131 | ppm   |
| Mg2795 | 0.2939   | ppm   |

|        |          |     |
|--------|----------|-----|
| Mn2576 | 0.02474  | ppm |
| Ni2216 | 0.8167   | ppm |
| Pd3404 | 0.003764 | ppm |
| Pt2144 | 0.001518 | ppm |
| Rh3434 | -0.09333 | ppm |
| Ru2678 | 0.1481   | ppm |
| Sb2068 | 0.05287  | ppm |
| Sn1899 | 1.23     | ppm |
| Sr4077 | 0.01644  | ppm |
| Zn2138 | 0.1565   | ppm |

**Table S2** Adding SnCl<sub>2</sub> to catalyze starch conversion

| Catalyst          | 2-MF (%) | Furfural (%) | 5-MF (%) | Total yield (%) |
|-------------------|----------|--------------|----------|-----------------|
| SnCl <sub>2</sub> | 1.8      | 1.0          | 29.7     | 32.5            |

Reaction Condition: 100 mg starch, 2 mmol NaI, 0.18 mmol HCl, 3.5% eq SnCl<sub>2</sub> (4.2 mg), 2 mL H<sub>2</sub>O, 3 mL MTHF, 500 r/min, 2 h, 300 psi H<sub>2</sub>, 160°C.

**Table S3** Effect of different iodized salts

| Entry | Salt | 2-MF% | Furfural% | 5-MF% | Total yield% |
|-------|------|-------|-----------|-------|--------------|
| 1     | KI   | 3.5   | 1.7       | 30.1  | 35.3         |
| 2     | NaI  | 3.6   | 1.5       | 31.1  | 36.2         |
| 3     | LiI  | 4.2   | 1.6       | 33.0  | 38.8         |

Reaction Condition: 100 mg starch, 2 mmol salt, 0.18 mmol HCl, 2 mL H<sub>2</sub>O, 3 mL MTHF, 500 r/min, 2 h, 300 psi H<sub>2</sub>, 160°C

**Table S4** 5-MF recovery experiment

| Substrate | Conversion (%) | Yield (%) |          |
|-----------|----------------|-----------|----------|
|           |                | 2-MF      | Furfural |
| 5-MF      | 41.0           | 34.6      | N. D.    |

Reaction Condition: 0.5 mmol HMF, 2 mmol NaI, 0.18 mmol HCl, 2 mL H<sub>2</sub>O 3 mL MTHF, 500 r/min, 2 h, 300 psi H<sub>2</sub>, 160°C.

**Table S5** Optimal conditions

| Entry | 2-MF/% | Furfural/% | 5-MF/% | Levulinic acid<br>/% | Humins wt.% |
|-------|--------|------------|--------|----------------------|-------------|
| 1     | 5.6    | 2.0        | 38.0   | 22.5                 | 45.6        |

Reaction Condition: 100 mg starch, 2 mmol NaI, 0.18 mmol HCl, 2 mL H<sub>2</sub>O, 6 mL MTHF, 500 r/min, 2 h, 300 psi H<sub>2</sub>, 160°C.

**Table S6** Product analysis

| Entry          | glucose /% | fructose<br>/% | HMF/% | Levulinic<br>acid /% | 2-MF/% | Furfural/<br>% | 5-MF/% | Humins<br>wt.% |
|----------------|------------|----------------|-------|----------------------|--------|----------------|--------|----------------|
| 1 <sup>a</sup> | 4.6        | 4.2            | 3.6   | 20.2                 | 3.6    | 1.5            | 32.1   | 13.9           |
| 2 <sup>b</sup> | 26.0       | 15.0           | 20.2  | 15.6                 | N. D.  | N. D.          | 1.7    | 5.6            |

<sup>a</sup>Reaction Condition: 100 mg starch, 2 mmol NaI, 0.18 mmol HCl, 2 mL H<sub>2</sub>O, 3 mL MTHF, 500 r/min, 2 h, 300 psi H<sub>2</sub>, 160°C. <sup>b</sup> 140°C.

**Table S7** Preparation of 2-iodomethylfuran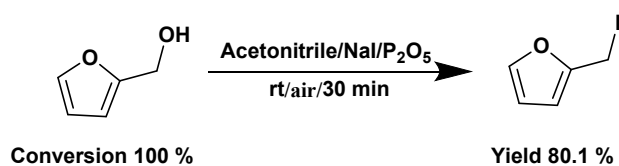

| Substrate        | Conversion (%) | 2-iodomethylfuran (%) |
|------------------|----------------|-----------------------|
| Furfuryl alcohol | 100            | 80.1                  |

Reaction Condition: 1.0 mmol furfuryl alcohol, 2 mmol NaI, 1.5 mmol P<sub>2</sub>O<sub>5</sub>, 5 mL acetonitrile, 1500 r/min, 30 min, rt.

**Table S8** Starch amplification experiment

| Entry | 2-MF (%) | Furfural (%) | 5-MF (%) | Total yield (%) |
|-------|----------|--------------|----------|-----------------|
| 1     | 1.5      | 1.6          | 31.3     | 34.4            |

Reaction Condition: 1 g starch, 20 mmol NaI, 1.8 mmol HCl, 10 mL H<sub>2</sub>O, 15 mL MTHF, 500 r/min, 3 h, 300 psi H<sub>2</sub>, 160°C.

**Table S9** Metal-free catalytic verification

| Entry | Metal salt        | 2-MF% | Furfural% | 5-MF% | Total yield% |
|-------|-------------------|-------|-----------|-------|--------------|
| 1     | /                 | 3.4   | 1.2       | 33.5  | 38.1         |
| 2     | PdCl <sub>2</sub> | 4.0   | 0.7       | 33.1  | 37.8         |
| 3     | RhCl <sub>3</sub> | 4.3   | 1.0       | 34.1  | 39.4         |

Reaction Condition: 100 mg starch, 2 mmol NaI, 0.18 mmol HCl, 2 mL H<sub>2</sub>O, 3 mL MTHF, 500 r/min, 2 h, 300 psi H<sub>2</sub>, 160°C. 1.8 % eq RhCl<sub>3</sub> · 3H<sub>2</sub>O (2.6 mg), 2.0 % eq PdCl<sub>2</sub> (1.9 mg).

Both THF, MTHF, and 1,4-dioxane contain trace amounts of butylated hydroxytoluene (BHT) and may interfere with experimental results. The results were the same using the solvent after re-distilled under the standard condition as shown in entries 1, 2, &3. Then we reduced the reaction time to 0.5 hours, and re-distilled MTHF as a solvent showed a better result as shown in entries 4 and 5. Thus BHT present indeed has an effect on the initial reaction rate, which proves that it is indeed a radical reaction.

**Table S10** Effect of re-distilling solvent

| Entry | Solvent                  | 2-MF% | Furfural% | 5-MF% | Total yield% |
|-------|--------------------------|-------|-----------|-------|--------------|
| 1     | MTHF                     | 2.8   | 1.0       | 30.5  | 34.3         |
| 2     | 1,4-dioxane              | 1.3   | N. D.     | 30.7  | 32.0         |
| 3     | THF                      | 2.7   | N. D.     | 28.3  | 31.0         |
| 4     | 0.5 h MTHF               | 3.9   | N. D.     | 18.6  | 22.5         |
| 5     | 0.5 h un-distilling MTHF | 3.7   | N. D.     | 9.9   | 13.6         |

Reaction Condition: 100 mg starch, 2 mmol NaI, 0.18 mmol HCl (0.015 mL), 2 mL H<sub>2</sub>O, 3 mL re-distilling Solvent, 500 r/min, 2 h, 300 psi H<sub>2</sub>, 160°C

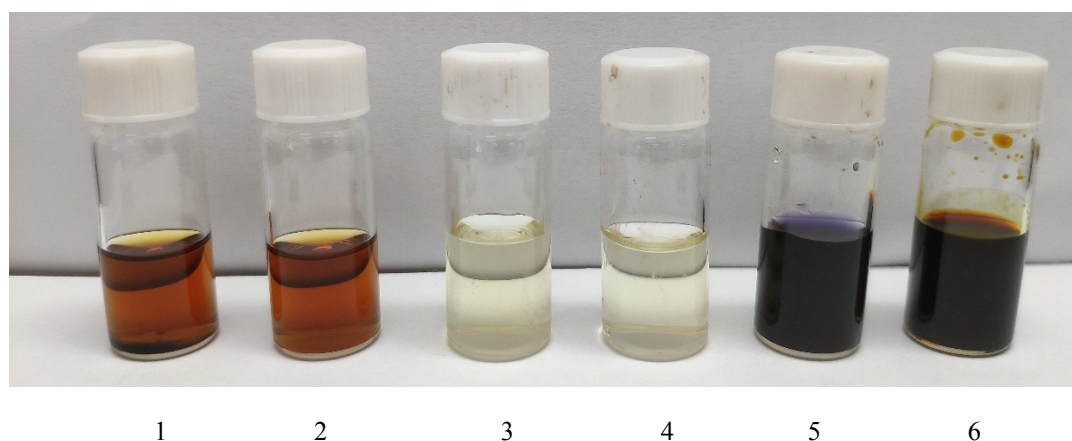

**Fig. S1** Detecting the iodine content in the reaction solution. 1. Organic phase. 2. Organic phase and starch potassium iodide. 3. aqueous phase 4. aqueous phase and starch potassium iodide. 5. Water, I<sub>2</sub> and starch potassium iodide. 6. MTHF, I<sub>2</sub> and starch potassium iodide.

#### Determination of the starch conversion

First, different concentrations of starch solution was prepared with potassium iodide added. Then, the absorbance was measured with an ultraviolet-visible spectrophotometer. And the result was used to draw a standard curve of absorbance to the starch concentration. Specific steps are as follows: Starch, or a fraction thereof (20, 40, 60, 80, 100, 120 mg), was accurately weighed and dissolved in 10 mL water. 1.00 ml of a solution of iodine (0.0025mol/L) in potassium iodide (0.0065mol/L) was added with mixing. Then the sample was put in a 1cm path length quartz cell, and the absorbance of the sample was read at 600nm using a UV/Visible spectrophotometer.

The starch content in the aqueous phase was determined under typical reaction conditions (100 mg starch, 2 mmol NaI, 0.18 mmol HCl, 2 mL H<sub>2</sub>O, 3 mL MTHF, 500 r/min, 2 h, 300 psi H<sub>2</sub>, 160°C) And the thermogravimetric curves of starch and humins were also determined. The residual starch in the aqueous phase was 0.26%, so the starch conversion rate was 99.74%.

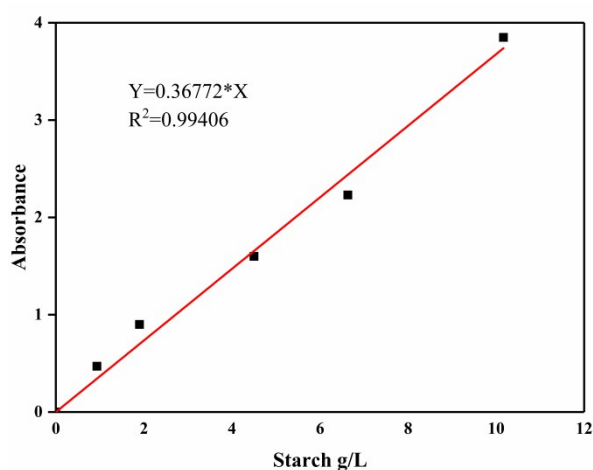

Fig. S2 Standard absorption curve of starch-iodine solution.

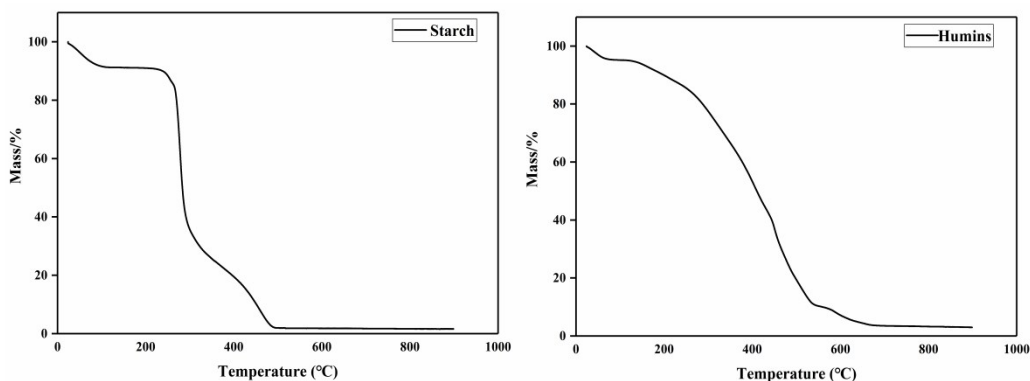

**Fig. S3** Starch and Humins thermogravimetric images.

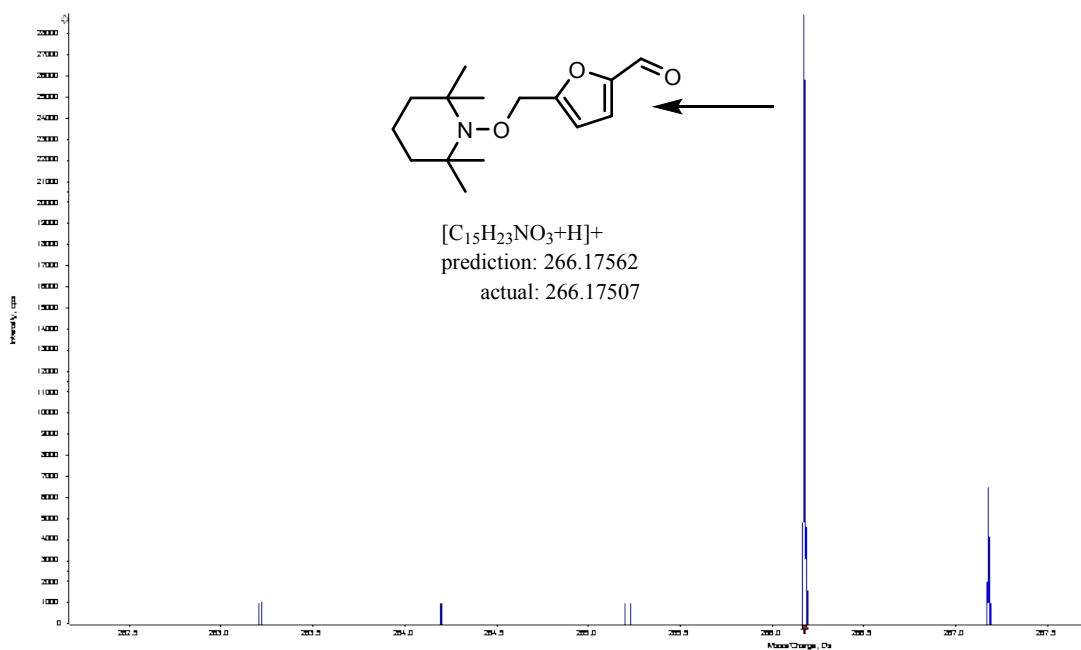

**Fig. S4**  $C_{15}H_{23}NO_3$  (Tempo captured the 5-MF radical to form a new compound) Q-TOF graph.  $C_{15}H_{23}NO_3$  hydrogenation ( $[C_{15}H_{23}NO_3+H]^+$ ) prediction quality 266.17562 under Q-TOF positive ion scan, actual measurement quality 266.17507.

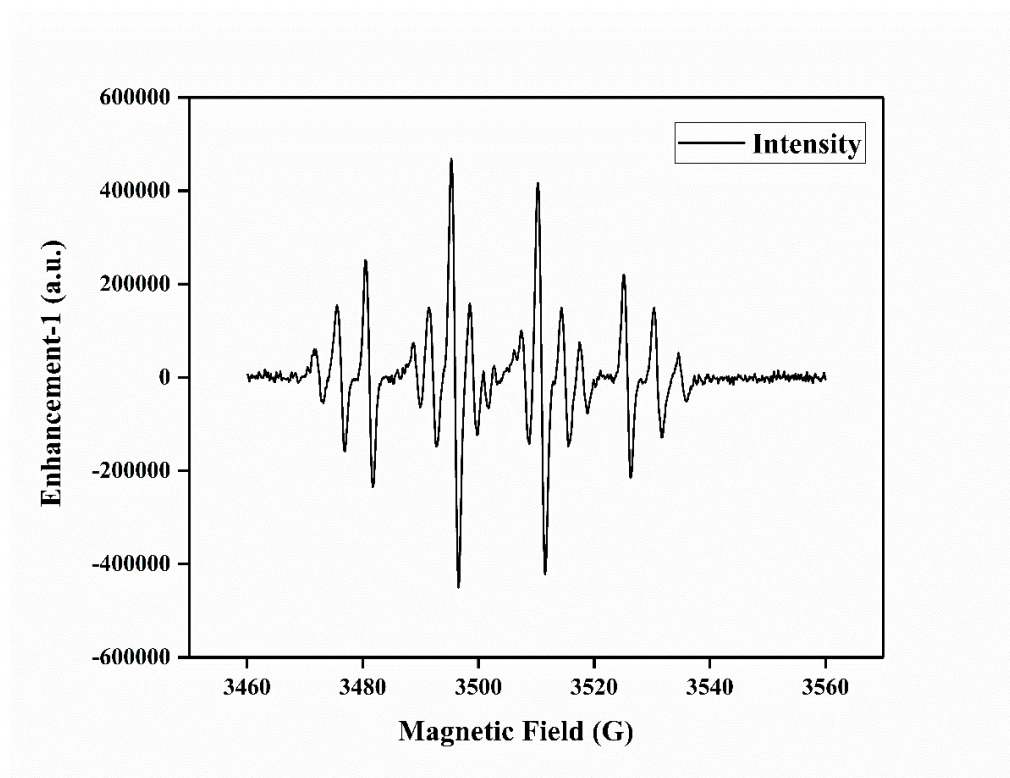

**Figure. S5** Continuous-wave EPR signal at typical condition. Reaction Condition: 1 mmol HMF, 4 mmol NaI, 0.36 mmol H<sub>2</sub>SO<sub>4</sub>, 6 mL MTHF, 60  $\mu$ L DMPO, 500 rpm, 20 min, 300 psi H<sub>2</sub>, 180°C.

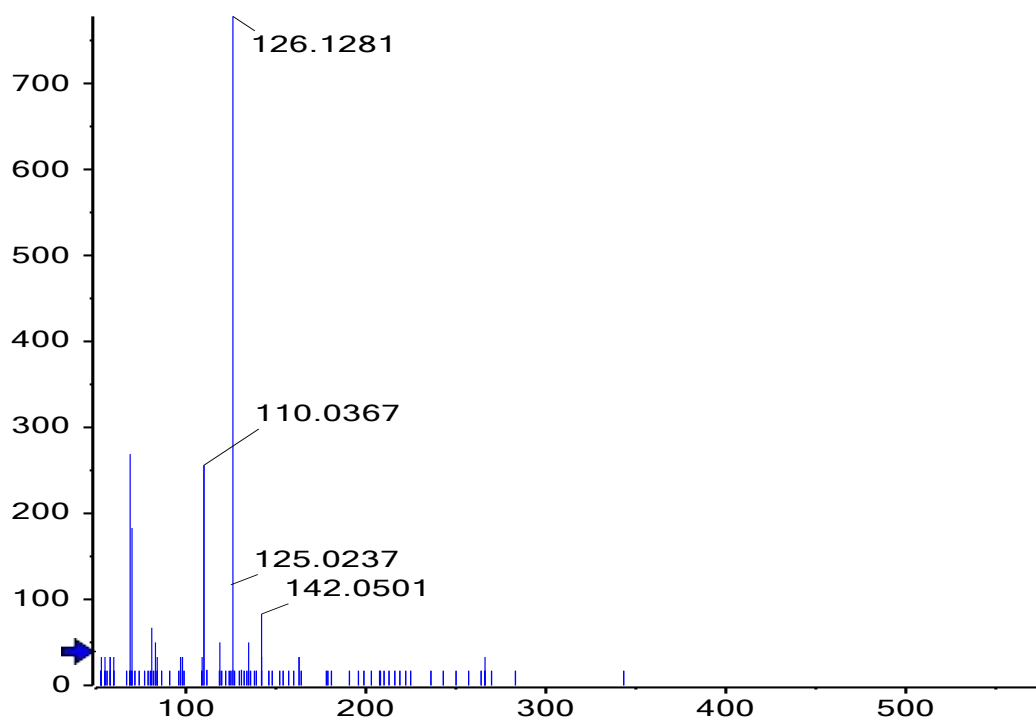

**Fig. S6** C<sub>15</sub>H<sub>23</sub>NO<sub>3</sub> (Tempo captured the 5-MF radical to form a new compound) Q-TOF fragment peak graph.



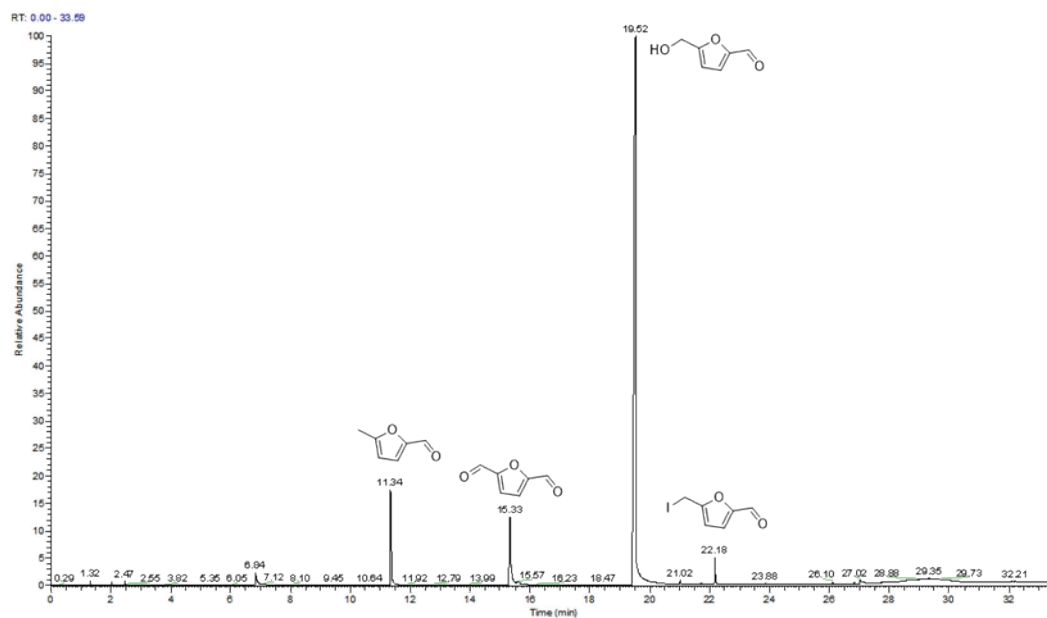

**Fig. S7** 5-iodomethylfuran-2-carbaldehyde GCMS graph. Ethyl acetate is GCMS washing needle solvent, chloroform by-product. At 2.1-3.5 min is the solvent MTHF peak, cut off on GCMS.

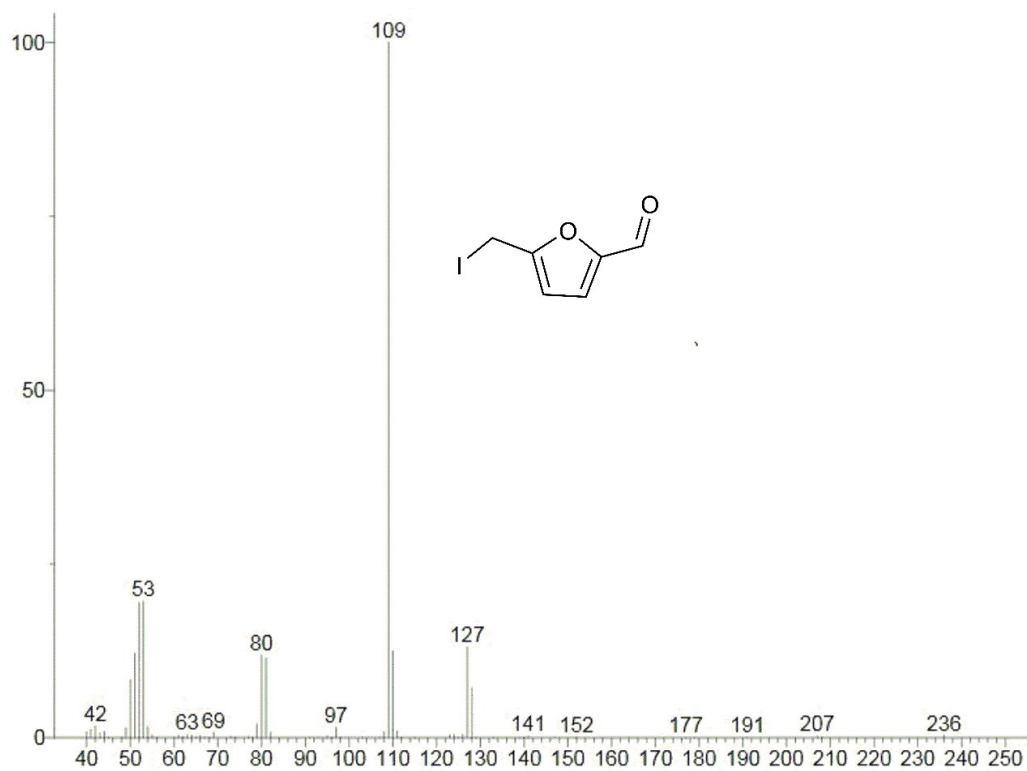

**Fig. S8** 5-iodomethylfuran-2-carbaldehyde GCMS fragment peak graph.
